# Supplementary material for: Regulation of the AbrA1/A2 Two-Component System in Streptomyces coelicolor and the Potential of Its Deletion Strain as a Heterologous Host for Antibiotic Production
Source: PubMed Central journal article supplement (PMC4193843; doi:10.1371/journal.pone.0109844), 2014-10-10
Supplement: pone.0109844.s001.pdf [file pone.0109844.s001.pdf]

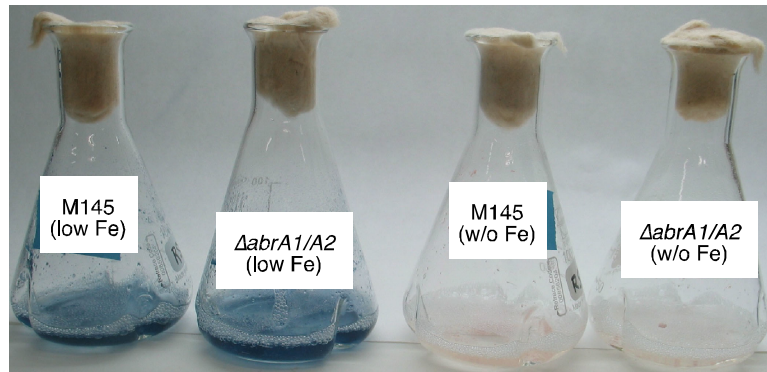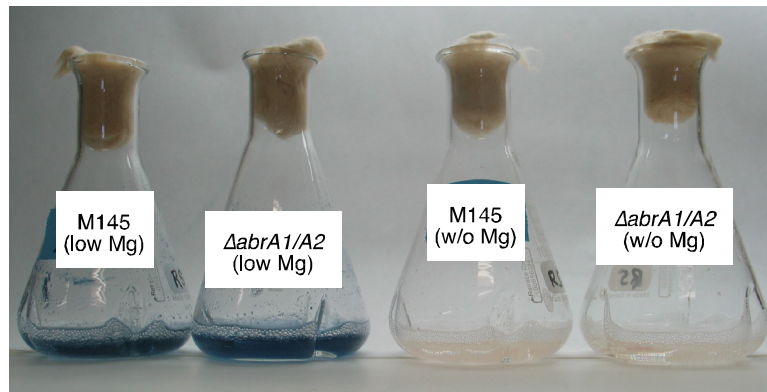

Figure S1: Liquid cultures of *S. coelicolor* M145 and *S. coelicolor*  $\DeltaabrA1/A2$  in NMMP with low or without Fe or Mg.  
Upper part: NMMP medium with 10  $\mu$ M Fe (low Fe) or without Fe (w/o Fe)  
Lower part: NMMP medium with 10  $\mu$ M Mg (low Mg) or without Mg (w/o Mg)
