# Supplementary material for: Regulation of the AbrA1/A2 Two-Component System in Streptomyces coelicolor and the Potential of Its Deletion Strain as a Heterologous Host for Antibiotic Production
Source: PubMed Central journal article supplement (PMC4193843; doi:10.1371/journal.pone.0109844), 2014-10-10
Supplement: pone.0109844.s002.pdf [file pone.0109844.s002.pdf]

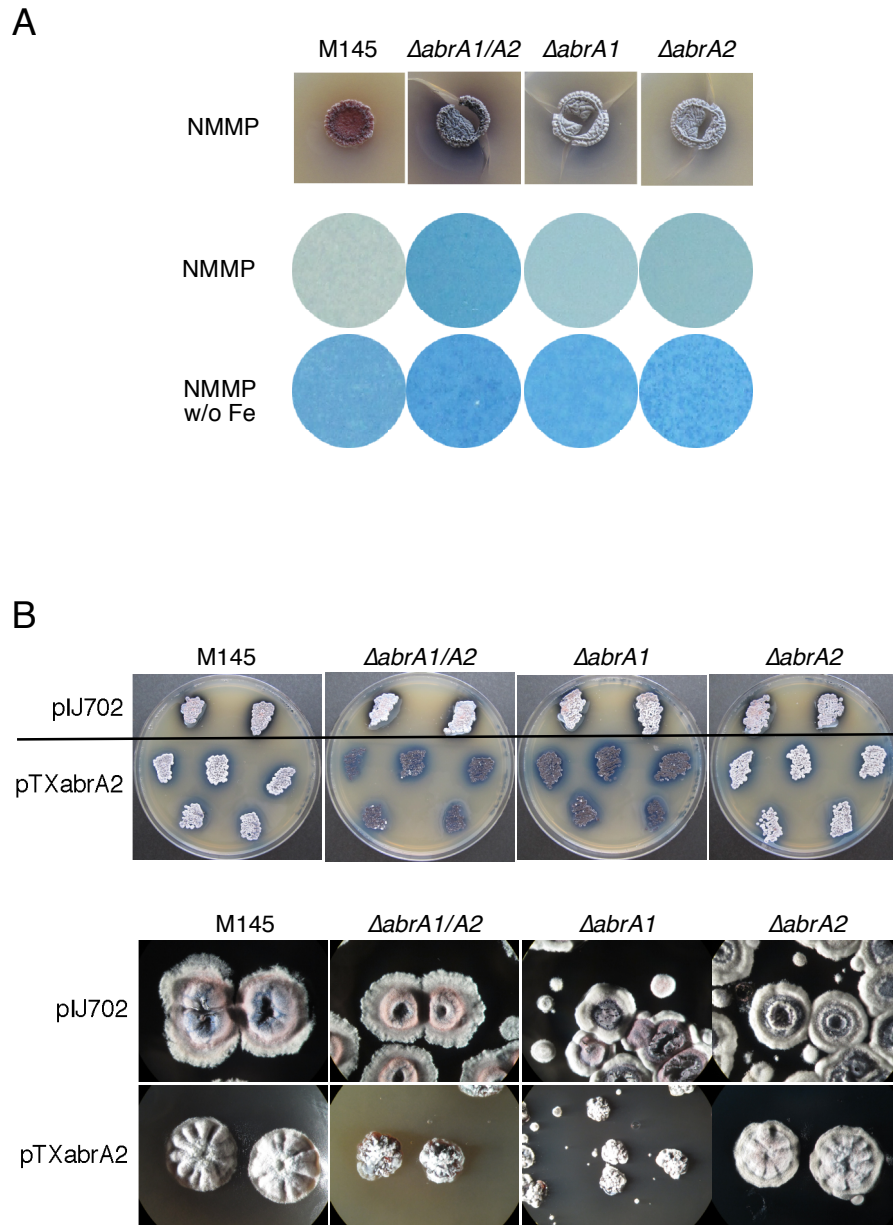

Figure S2: Phenotypes of  $\DeltaabrA1$  and  $\DeltaabrA2$  mutants.

A) ACT production and differentiation of colonies of the different strains (upper part) in NMMP at seven days (upper part); in the lower part, ACT production of the strains inoculated as a lawn in NMMP with or without (w/o Fe) at three days and the images correspond to backward sections of the plates.

B) Morphology of *S. coelicolor* M145,  $\DeltaabrA1/A2$ ,  $\DeltaabrA1$ , and  $\DeltaabrA2$  strains transformed with pIJ702 (control) or pTXabrA2 (expressing the AbrA2 RR under the control of *xysAp*). The photographs correspond to four-day cultures on R2(YE) medium. Upper part: growth in patches of different transformants; lower part: colony growth morphology.
