# Supplementary material for: Regulation of the AbrA1/A2 Two-Component System in Streptomyces coelicolor and the Potential of Its Deletion Strain as a Heterologous Host for Antibiotic Production
Source: PubMed Central journal article supplement (PMC4193843; doi:10.1371/journal.pone.0109844), 2014-10-10
Supplement: pone.0109844.s003.pdf [file pone.0109844.s003.pdf]

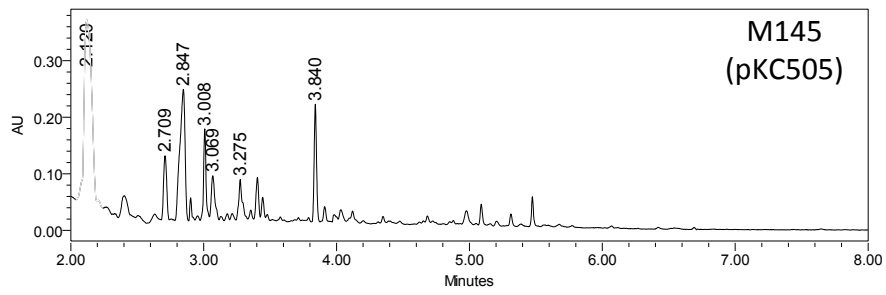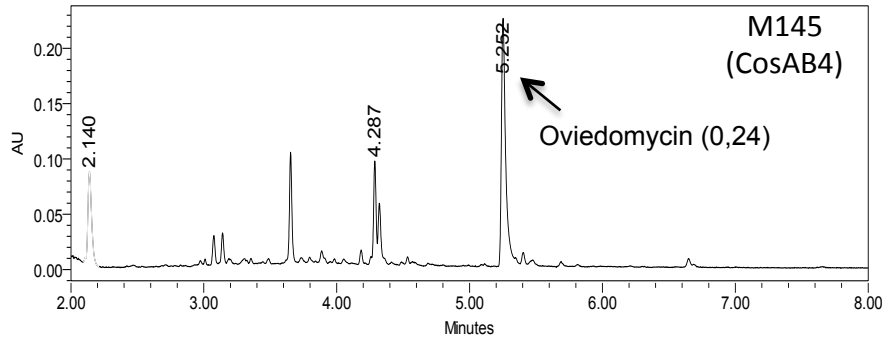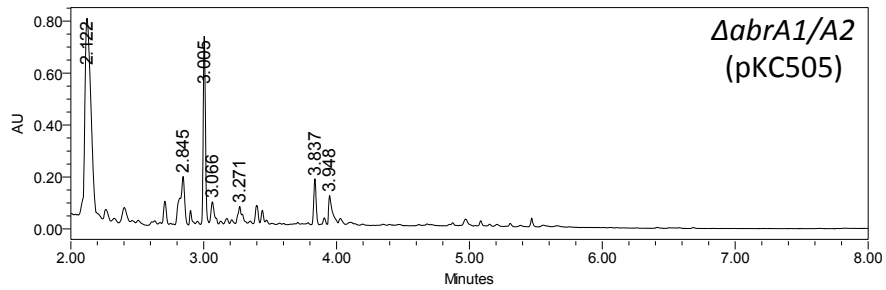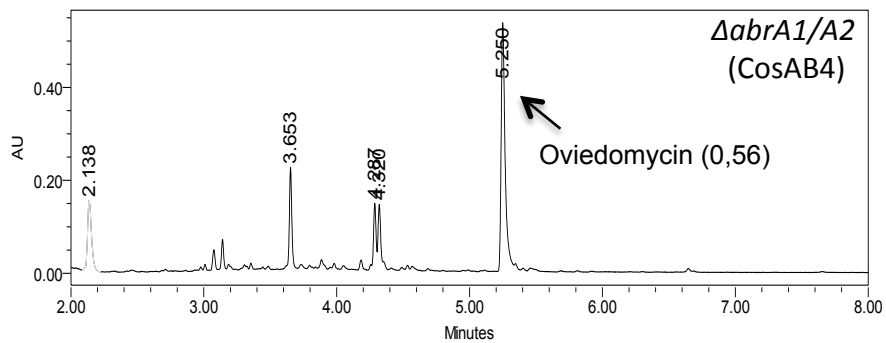

Figure S3: Ovidomycin UPLC profiles production.  
 UPLC profiles of *S. coelicolor* M145 and *S. coelicolor*  $\Delta$ abrA1/A2 harbouring pKC505 (empty vector) or CosAB4 (containing ovidomycin cluster)  
 Ovidomycin peak is marked with an arrow and the peak height is shown in brackets
