# Supplementary material for: Regulation of the AbrA1/A2 Two-Component System in Streptomyces coelicolor and the Potential of Its Deletion Strain as a Heterologous Host for Antibiotic Production
Source: PubMed Central journal article supplement (PMC4193843; doi:10.1371/journal.pone.0109844), 2014-10-10
Supplement: pone.0109844.s004.pdf [file pone.0109844.s004.pdf]

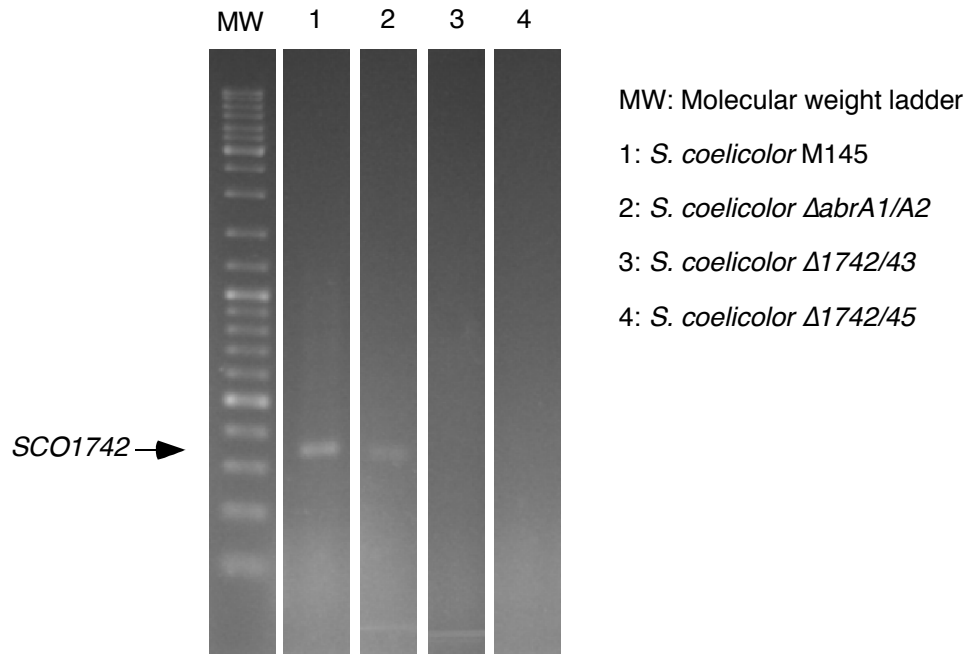

Figure S4: Expression of *SCO1742* in the different strains by RT-PCR. Amplification by RT-PCR of a region of *SCO1742* gene in the wild type strain *S. coelicolor* M145 and the different mutants  $\Delta$ *abrA1/A2*,  $\Delta$ 1742/43, and  $\Delta$ 1742/45.
