# Supplementary material for: Regulation of the AbrA1/A2 Two-Component System in Streptomyces coelicolor and the Potential of Its Deletion Strain as a Heterologous Host for Antibiotic Production
Source: PubMed Central journal article supplement (PMC4193843; doi:10.1371/journal.pone.0109844), 2014-10-10
Supplement: pone.0109844.s005.pdf [file pone.0109844.s005.pdf]

**Table S1 – Primers used in this work**

| <b>Primers</b> | <b>Sequence (5'-3')</b>                                        | <b>Function</b>                                                                                                 |
|----------------|----------------------------------------------------------------|-----------------------------------------------------------------------------------------------------------------|
| AY-006P        | GAGCCCCCGCACACCGCGGCCACGGTGTGC<br>GGGGGCTCATGTAGGCTGGAGCTGCTTG | Reverse oligonucleotide for amplifying the mutagenesis cassette for 1742-45 genes. PAGE-purified.               |
| AY-033         | TTTTTT <u>GAATTC</u> CTCACGTCCTCCTGTGGGGGG                     | Forward oligonucleotide for amplifying the <i>abrA</i> promoter. The sequence recognized by EcoRI is underlined |
| AY-034         | TTTTTT <u>CATATG</u> TCCGAAGCCTCCGGTGTGCC                      | Reverse oligonucleotide for amplifying the <i>abrA</i> promoter. The sequence recognized by NdeI is underlined  |
| AY-035         | TTTTT <u>CATATG</u> AACGACCTCTTCGGGCGGG                        | Forward oligonucleotide for cloning <i>abrA1</i> . The sequence recognized by NdeI is underlined                |
| AY-036         | TTTTT <u>CTCGAGT</u> CAGCCCGTGCCGCCGGGG                        | Reverse oligonucleotide for cloning <i>abrA2</i> . The sequence recognized by XhoI is underlined                |
| AY-043         | GGCACACCGGAGGCTTCGGACATGATTCCGGG<br>GATCCGTCGACC               | Forward oligonucleotide for amplifying the mutagenesis cassette for 1742/43 and 1742-45 genes. First PCR        |
| AY-044         | CCCGCCCGAAGAGGTCGTTCACTGTAGGCTGG<br>AGCTGCTTC                  | Reverse oligonucleotide for amplifying the mutagenesis cassette for 1742/43 genes. First PCR                    |
| AY-045         | TGGGTGGAGGACGGGGAGATCGGCACACCGG<br>AGGCTTCGGAC                 | Forward oligonucleotide for amplifying mutagenesis cassette for 1742/43 and 1742-45 genes. Second PCR           |
| AY-046         | AACAGGTCGTACGCCCGCCGGGCCCGCCCGA<br>AGAGGTCGTTAC                | Reverse oligonucleotide for amplifying the mutagenesis cassette for 1742/43 genes. Second PCR                   |
| AY-047         | TTTTTT <u>CATATG</u> ACCATCCGCCTGCTGATCG                       | Forward oligonucleotide for cloning <i>abrA2</i> . The sequence recognized by NdeI is underlined.               |
| AY-048         | TTTTTT <u>CTCGAGG</u> CCCGTGCCGCCGGGGAGG                       | Reverse oligonucleotide for cloning <i>abrA2</i> . The sequence recognized by XhoI is underlined.               |
| AY-061         | GGGCTCGCCGCGGCGCTCC                                            | Forward oligonucleotide for RT-PCR of <i>SCO1742</i> .                                                          |
| AY-062         | AACCGGCCTCCGTCGTCGGTC                                          | Reverse oligonucleotide for RT-PCR of <i>SCO1742</i> .                                                          |
| AY-102         | TTTTTT <u>CTCGAGG</u> ATCGACGGCGACAGCAGGG                      | Reverse oligonucleotide for cloning N-terminal <i>abrA2</i> . The sequence recognized by XhoI is underlined.    |

|         |                                                                                   |                                                                                                          |
|---------|-----------------------------------------------------------------------------------|----------------------------------------------------------------------------------------------------------|
| AY-103  | GGTCCTGATGGCCATCCGCATGC                                                           | Forward oligonucleotide for the point mutation AbrA2_D55A (bold).                                        |
| AY-104  | GCATGCGGATGGCCATCAGGACC                                                           | Reverse oligonucleotide for the point mutation AbrA2_D55A.                                               |
| SRG-045 | CCGGTACGGATCAGTTCCTGGTCGTCGACGAT<br>CAGCAGGCGGATGGTCATTGTAGGCTGGAGCT<br>GCTTC     | Reverse oligonucleotide for amplifying the mutagenesis cassette for 1744.                                |
| SRG-046 | TCGTGGTGACCGCCCGCCTGCCCGTCGAGGAC<br>GCCGGGGACGCGGCATGAGTGATTCCGGGGA<br>TCCGTCGACC | Forward oligonucleotide for amplifying the mutagenesis cassette for 1745.                                |
| SRG-047 | TTTTTTCATATGAACGACCTCTTCGGGCGGG                                                   | Forward oligonucleotide for cloning 1744 ( <i>abrA1</i> ) with <i>xysAp</i> .                            |
| SRG-050 | GGTCCTGATGGAAATCCGCATGC                                                           | Forward oligonucleotide for the point mutation AbrA2_D55E                                                |
| SRG-051 | GCATGCGGATTTCCATCAGGACC                                                           | Reverse oligonucleotide for the point mutation AbrA2_D55E.                                               |
| SRG-058 | GGCAGCGCGACGAGCCCCGCACACCGCGGC<br>CACGGTGTGCGGGGGCTCATGTAGGCTGGAG<br>CTGCTTC      | Reverse oligonucleotide for amplifying the mutagenesis cassette for 1745.                                |
| SRG-059 | CGCGGTCACGCTGGTCGCGGTCGTGGTTCGAG<br>CGACGGCGCGATCTGGCGTGATTCCGGGGATC<br>CGTCGACC  | Forward oligonucleotide for amplifying the mutagenesis cassette for 1744.                                |
| SRG-060 | TTTTTTCATATGACCATCCGCCTGCTGATCGTC<br>GACGCCAGGAAGT                                | Forward oligonucleotide for the point mutation AbrA2_D10A. The sequence recognized by NdeI is underlined |
| SAM-001 | TTTTTTC <u>TCGAGT</u> CATGCCGCGTCCCCGGCGTC<br>C                                   | Reverse oligonucleotide for cloning <i>abrA1</i> . The sequence recognized by XhoI is underlined         |
