# Supplementary material for: Regulation of the AbrA1/A2 Two-Component System in Streptomyces coelicolor and the Potential of Its Deletion Strain as a Heterologous Host for Antibiotic Production
Source: PubMed Central journal article supplement (PMC4193843; doi:10.1371/journal.pone.0109844), 2014-10-10
Supplement: pone.0109844.s006.pdf [file pone.0109844.s006.pdf]

**Table S2 - Plasmids and cosmids used in this work**

| <b>Vector</b> | <b>Characteristics</b>                                                                                       | <b>Reference</b>                  |
|---------------|--------------------------------------------------------------------------------------------------------------|-----------------------------------|
| SCI11         | Supercos-1 derivative: <i>bla</i> , <i>neo</i> . Contains genes <i>SCO1744/45</i>                            | [1]                               |
| ΔSCI11-2      | SCI11 Δ <i>SCO1744::aac(3)IV</i>                                                                             | This work                         |
| ΔSCI11-3      | SCI11 Δ <i>SCO1745::aac(3)IV</i>                                                                             | This work                         |
| ΔSCI11-4      | SCI11 Δ <i>SCO172-45::aac(3)IV</i>                                                                           | This work                         |
| ΔSCI11-5      | SCI11 Δ <i>SCO1742/43::aac(3)IV</i>                                                                          | This work                         |
| pKC505        | Shuttle cosmid vector <i>E. coli-Streptomyces</i> . Apramycin resistance                                     | [2]                               |
| CosAB4        | pKC505 derivative replicative cosmid containing the cluster of ovidomycin from <i>S. antibioticus</i>        | [3]                               |
| pKC505ie      | pKC505 shuttle cosmid integrative vector with PhiC31 integration site. Apramycin and erythromycin resistance | Lombo et al (unpublished results) |
| CosAB4ie      | pKC505ie derivative integrative cosmid containing the cluster of ovidomycin from <i>S. antibioticus</i>      | Lombo et al (unpublished results) |
| pNX4          | pN702GEM3 derivative containing <i>xysA</i> Δ under <i>xysAp</i>                                             | [4]                               |
| pNA4          | pNX4 derivative containing <i>xysA</i> under <i>abrAp</i>                                                    | This work                         |
| pHabrA        | Integrative plasmid containing <i>abrA1/A2</i> under <i>abrAp</i> with hygromycin resistance                 | [5]                               |
| pHabrA1       | pHabrA derivative containing <i>abrA1</i> under <i>abrAp</i>                                                 | This work                         |
| pHabrA2       | pHabrA derivative containing <i>abrA2</i> under <i>abrAp</i>                                                 | This work                         |
| pXHis1        | <i>E. coli</i> plasmid ampicillin resistance containing <i>xysA</i> Δ under <i>xysAp</i>                     | [6]                               |
| pXabrA2His    | pXHis1 derivative containing <i>abrA2</i> under the <i>xysA</i> promoter                                     | This work                         |
| pIJ702        | <i>Streptomyces</i> muticopy plasmid thiostreptone resistance                                                | [7]                               |
| pTXabrA2      | pIJ702 derivative containing <i>abrA2</i> under the <i>xysA</i> promoter                                     | This work                         |
| pTXabrA2-DA   | pTXabrA2 derivative expressing the AbrA2-D55A mutation                                                       | This work                         |
| pTXabrA2-DE   | pTXabrA2 derivative expressing the AbrA2-D55E mutation                                                       | This work                         |
| pTXabrA2-DADE | pTXabrA2 derivative expressing AbrA2-D10A/D55E mutation                                                      | This work                         |

|                       |                                                                                                                                 |           |
|-----------------------|---------------------------------------------------------------------------------------------------------------------------------|-----------|
| pET22b                | <i>E. coli</i> expression vector. Ampicillin resistance.                                                                        | Novagen   |
| pET22abrA2            | pET22b derivative containing <i>abrA2</i> with a His6 tag at the carboxy terminal.                                              | This work |
| pETabrA2 <sub>N</sub> | pET22b derivative containing a truncated <i>abrA2</i> with a His6 tag at the carboxy terminal. Corresponds to the first 141 AAs | This work |

## References

1. Redenbach M, Kieser HM, Denapaite D, Eichner A, Cullum J, et al. (1996) A set of ordered cosmids and a detailed genetic and physical map for the 8 Mb *Streptomyces coelicolor* A3(2) chromosome. *Molecular Microbiology* 21: 77-96.
2. Richardson MA, Kuhstoss S, Solenberg P, Schaus NA, Rao RN (1987) A new shuttle cosmid vector, pKC505, for streptomycetes: its use in the cloning of three different spiramycin-resistance genes from a *Streptomyces ambofaciens* library. *Gene* 61: 231-241.
3. Mendez C, Kunzel E, Lipata F, Lombo F, Cotham W, et al. (2002) Oviedomycin, an unusual angucyclinone encoded by genes of the oleandomycin-producer *Streptomyces antibioticus* ATCC11891. *Journal of natural products* 65: 779-782.
4. Rodríguez S, Santamaría RI, Fernández-Ábalos JM, Díaz M (2005) Identification of the sequences involved in the glucose-repressed transcription of the *Streptomyces halstedii* JM8 *xysA* promoter. *Gene* 351: 1-9.
5. Yepes A, Rico S, Rodriguez-Garcia A, Santamaria RI, Diaz M (2011) Novel two-component systems implied in antibiotic production in *Streptomyces coelicolor*. *PLoS One* 6: e19980.
6. Adham SA, Honrubia P, Díaz M, Fernández-Ábalos JM, Santamaría RI, et al. (2001) Expression of the genes coding for the xylanase Xys1 and the cellulase Cell

from the straw-decomposing *Streptomyces halstedii* JM8 cloned into the amino-acid producer *Brevibacterium lactofermentum* ATCC13869. Arch Microbiol 177: 91-97.

7. Katz E, Thompson CJ, Hopwood DA (1983) Cloning and expression of the tyrosinase gene from *Streptomyces antibioticus* in *Streptomyces lividans*. Journal of General Microbiology 129: 2703-2714.
